# Supplementary material for: Pathways in permanganate oxidation of mandelic acid: reactivity and selectivity of intermediate manganese species
Source: Royal Society of Chemistry journal article supplement (doi:10.1039/d3dt02948d), 2023-01-01
Supplement: d3dt02948d1.pdf [file d3dt02948d1.pdf]

**PATHWAYS IN PERMANGANATE OXIDATION OF MANDELIC ACID: REACTIVITY AND  
SELECTIVITY OF INTERMEDIATE MANGANESE SPECIES.**

Tanden A. Hovey<sup>1</sup>, Disha Mishra<sup>1,3</sup>, Manveer Singh<sup>1</sup>, Grecia Anaya<sup>1</sup>, Chantele Owusu<sup>1</sup>, Nicole C. Barvian<sup>1</sup>, Kellen J. Sorauf<sup>1</sup>, Mata Dambarudhar Patro<sup>2,4</sup>, Akhil K. Panigrahi<sup>2</sup> and Surendra N. Mahapatro<sup>1\*</sup>

<sup>1</sup>Department of Chemistry, Regis University, Denver, CO 80221, USA.

<sup>2</sup>Department of Chemistry, Khallikote University, Berhampur, 760001, Odisha, India

<sup>3</sup>Participant, Regis University, Science Bridge program, Legacy High school, Broomfield, CO

<sup>4</sup>Visiting Professor from Khallikote University, India

## Supplementary Information

Mass Spectra of  $\alpha$ -Deuteromandelic Acid (Mol. Wt. 153) at an  
Electron Beam Energy of 8.2 eV.<sup>a</sup>

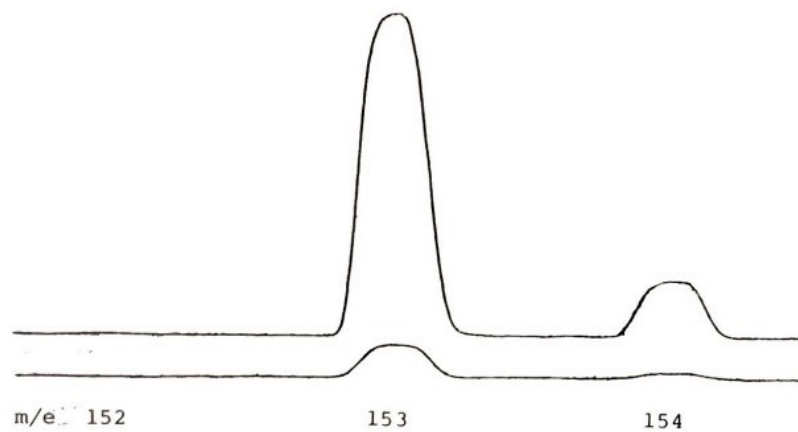

<sup>a</sup>Size of spectrum reproduced here has been reduced to  
approximately 4/9 of the original.

228

Figure S1. Mass spectra of  $\alpha$ -deuteromandelic acid

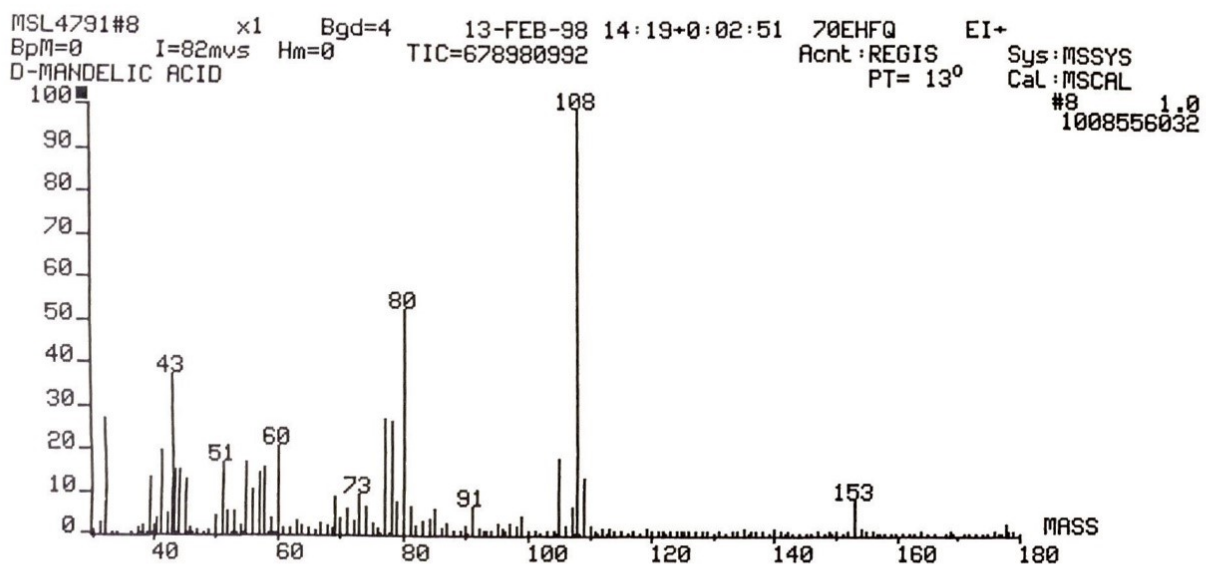

**Figure S2.** Mass Spectrum of  $\alpha$ -deuteromandelic acid

Molecular ion,  $m/z = 153$ , base peak  $m/z = 108$ . The deuterium content was determined by mass spectrometry to be  $\geq 98\%$  and by NMR

$\alpha$ -Deutero-mandelic acid

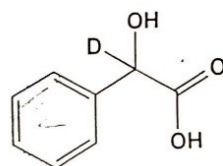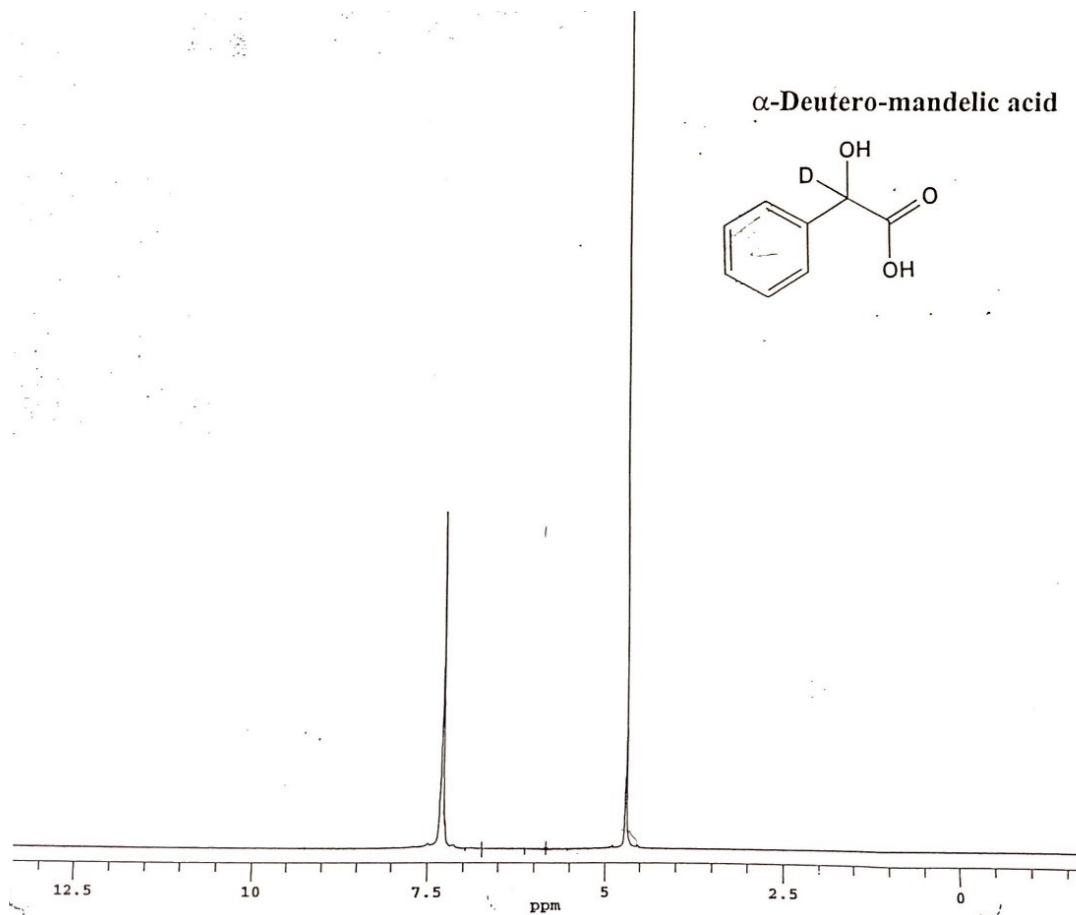

Figure S3.  $^1\text{H-NMR}$  of  $\alpha$ -deutero-mandelic acid in  $\text{D}_2\text{O}$ . Peak at 4.6 is due to HOD

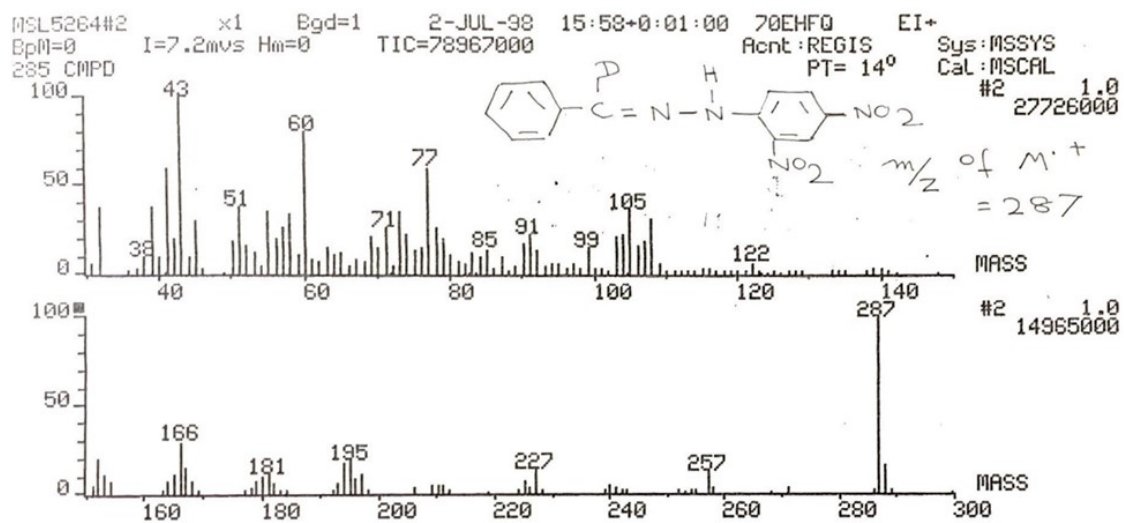

2:4 Dinitro Phenyl Hydrazone of Benzaldehyde.

Molecular Mass = 287 which shows it is Deuterio Benzaldehyde obtained from Deuterio Mandelic acid

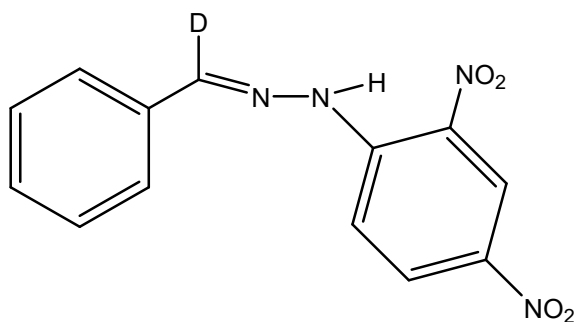

Figure S4A. EI-MS of 2,4-dinitrophenylhydrazone derivative of benzaldehyde

File : C:\HPCHEM\2\DATA\SNM\SNM-35.D  
 Operator : OLGA  
 Acquired : 2 Jul 98 4:06 pm using AcqMethod AUX G0.3  
 Instrument : ES  
 Sample Name: BENZALDEHYDE D ?  
 Misc Info : CHCl3 + MeOH, +OXALIC ACID  
 Vial Number: 0

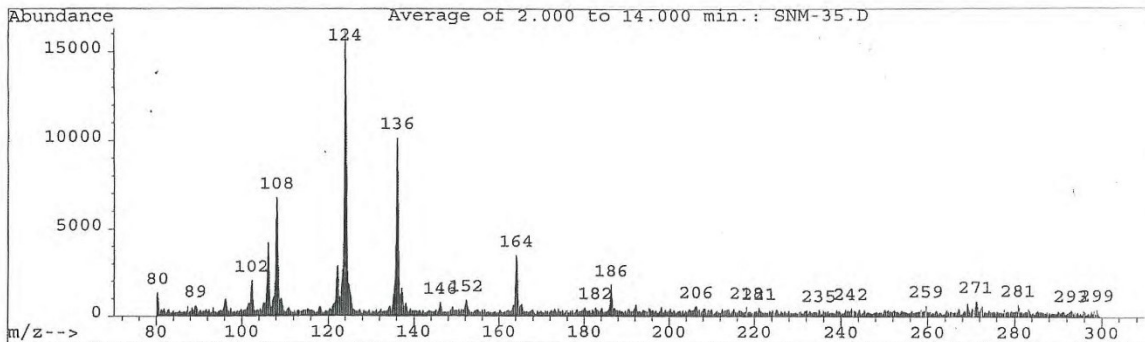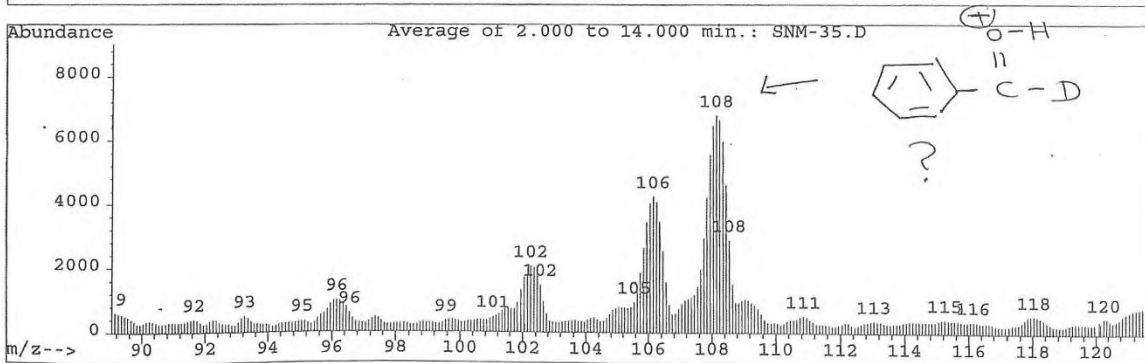

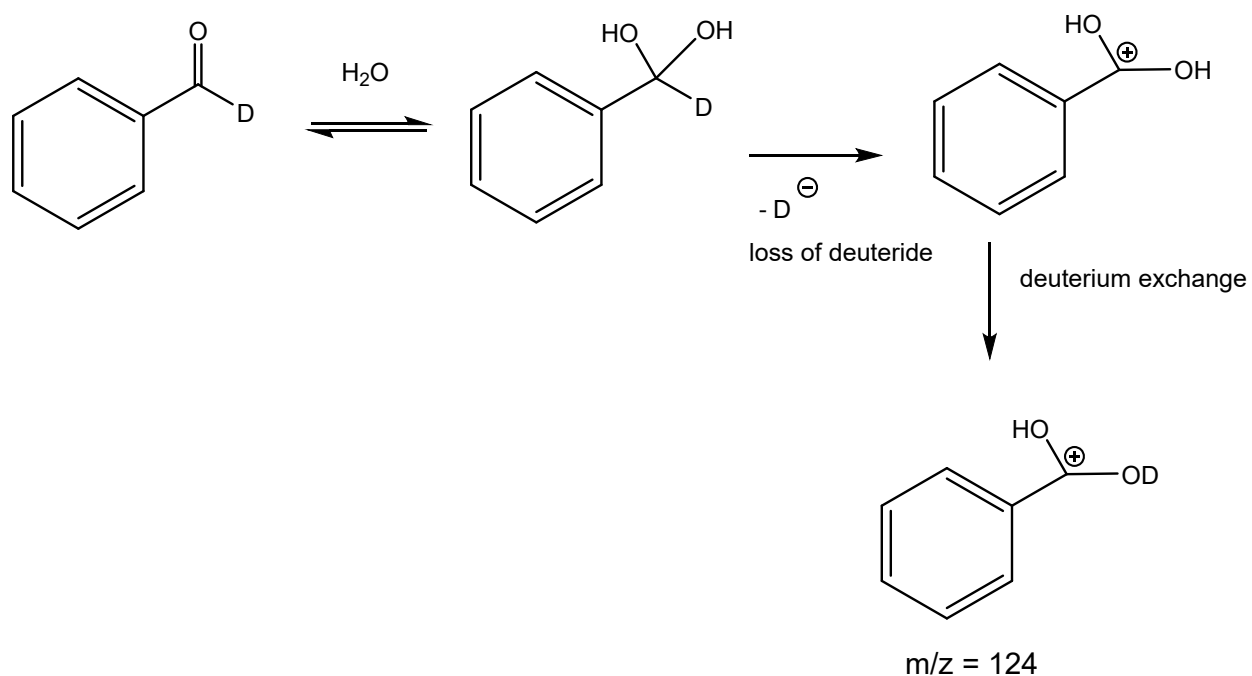

Figure S4B. (Top) ESI-MS of Benzaldehyde-D. (Bottom) Proposed ion at  $m/z = 124$ .

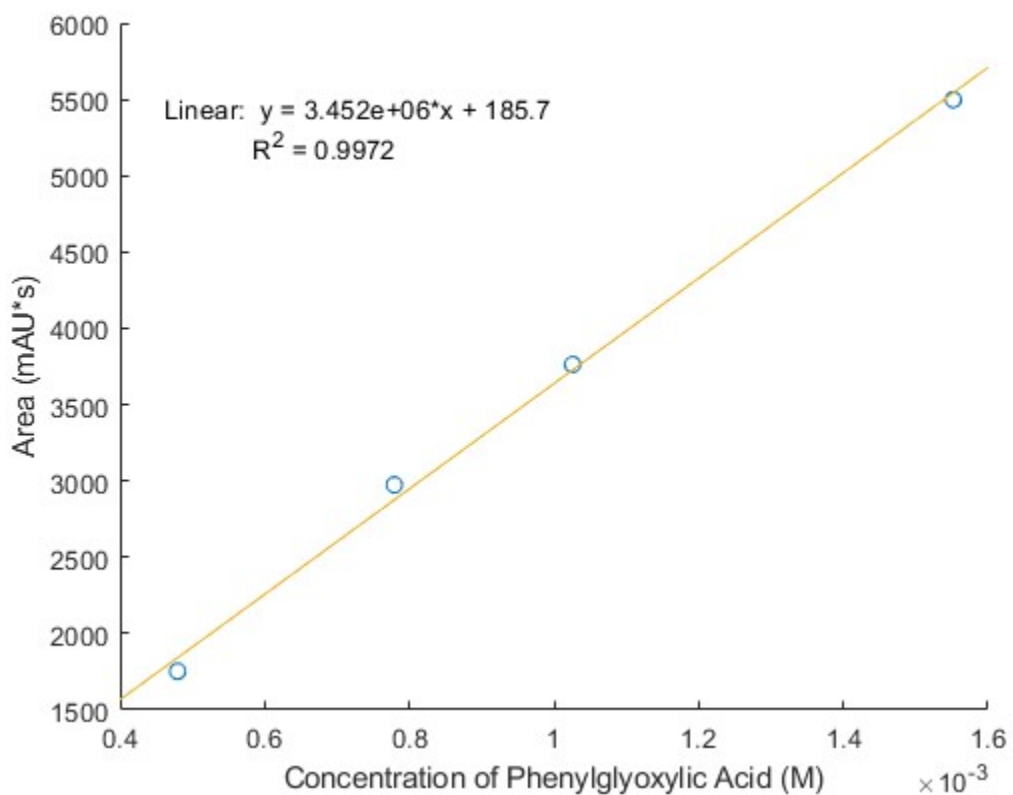

Figure S5. Standard curve for phenylglyoxylic acid (PGA). 264 nm detection.

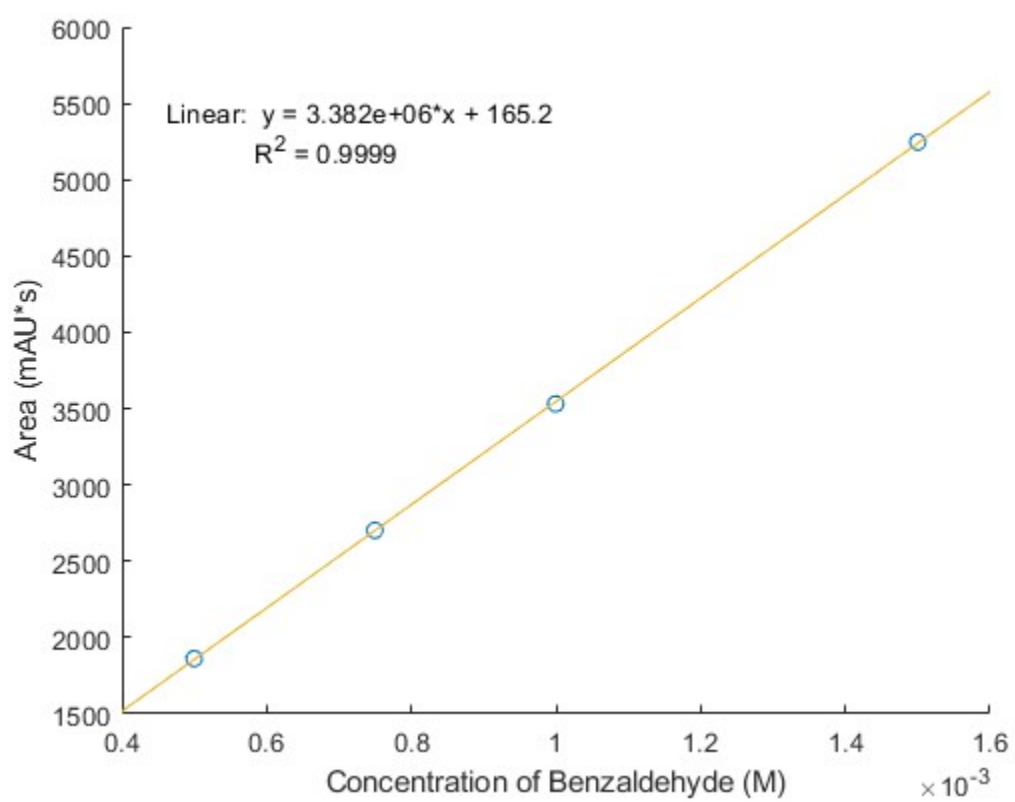

Figure S6. Standard curve for benzaldehyde (BZ). 254 nm detection



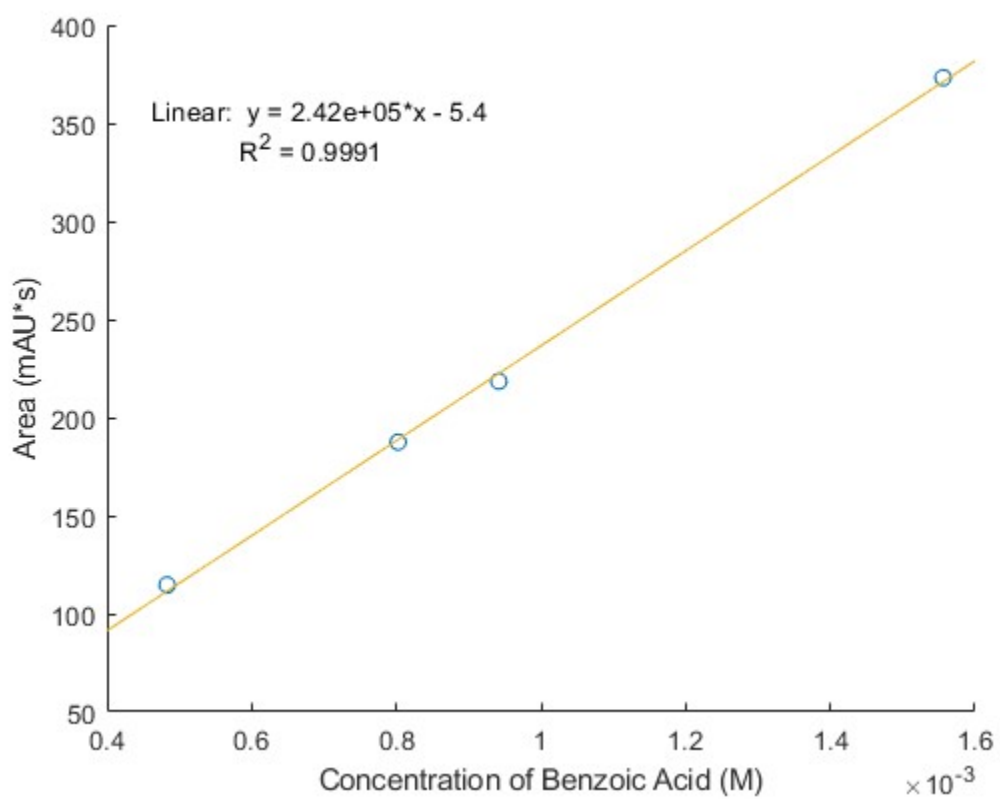

**Figure S7. Standard curve for benzoic acid (BA). 254 nm detection.**

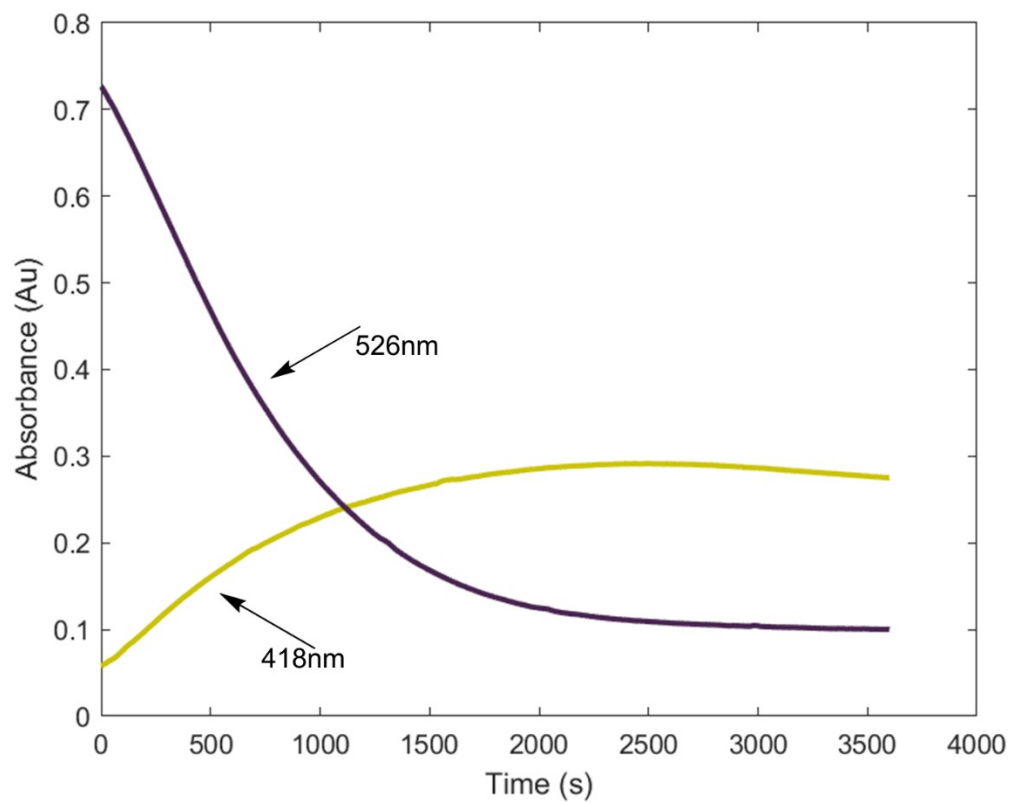

**Figure S8.** The growth of a soluble Mn(IV) species is observed at neutral pH in the oxidation of mandelic acid by permanganate. Conditions: mandelate = 0.05 M,  $\text{MnO}_4^-$  =  $3.0 \times 10^{-4}$  M, pH = 7 (0.1 M phosphate buffer)

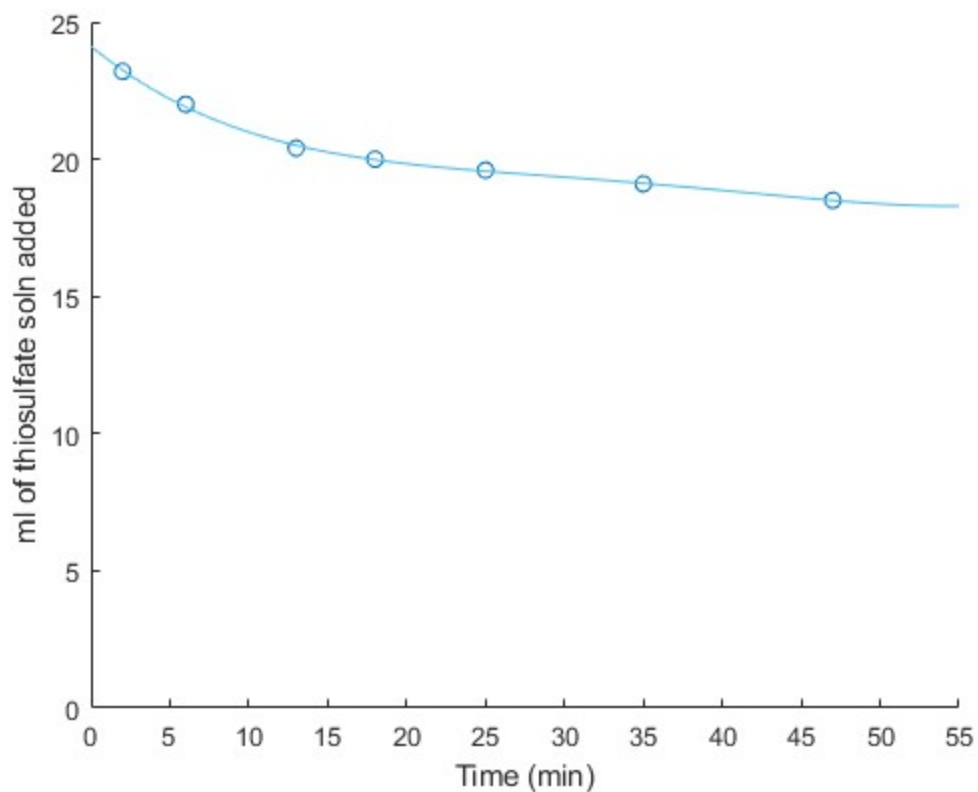

**Figure S9. Determination of oxidation of the intermediate manganese species by Iodometric titrations** Oxidation of mandelic acid by permanganate. Conditions: mandelate = 0.05 M,  $\text{MnO}_4^-$  =  $1.0 \times 10^{-3}$  M, pH = 13; 22 °C.

Thiosulfate = 1 mM. Total reaction volume 50 ml. Five mL aliquots were quenched with NaI in acidic medium and titrated with 1 mM thiosulfate

Initial titer at zero-time = 25 mL

Assuming that the intermediate stabilized at Mn(VI) the final titer should be  $\approx 20$  mL.

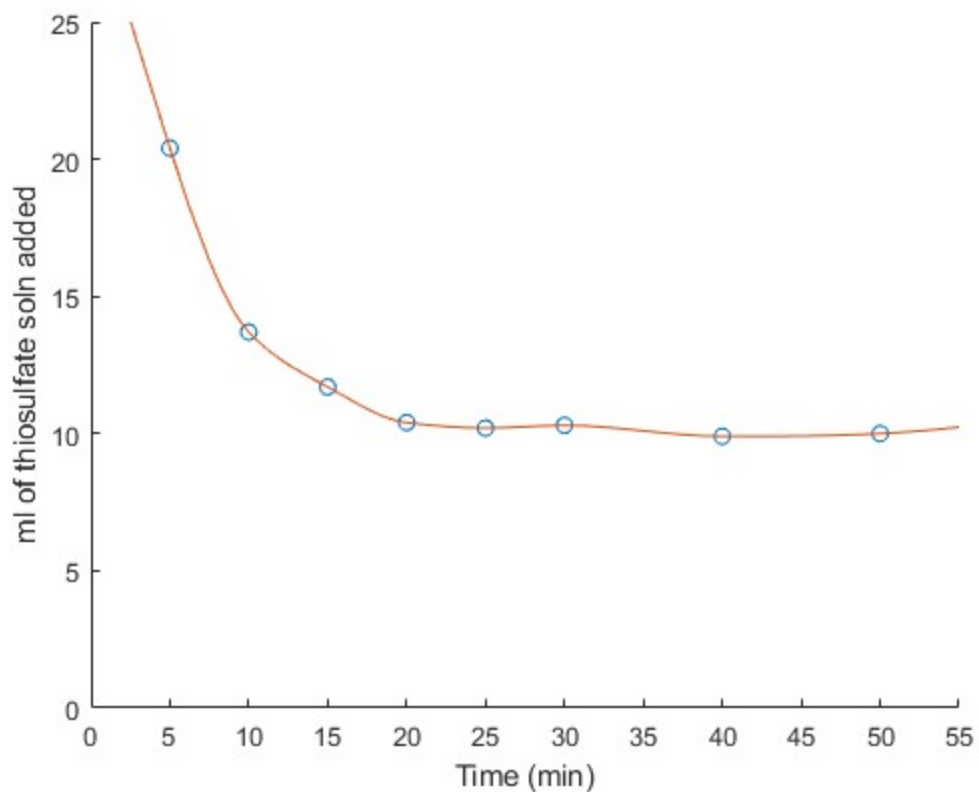

**Figure S10. Determination of oxidation of the intermediate manganese species by Iodometric titrations in the oxidation of mandelic acid by permanganate.** Conditions: mandelate = 0.05 M,  $\text{MnO}_4^- = 1.0 \times 10^{-3}$  M, pH = 7 (0.1 M phosphate buffer); 22 °C.

Thiosulfate = 1 mM

Assuming that the intermediate stabilized at Mn(IV) the titer should be  $\approx 10$  mL.

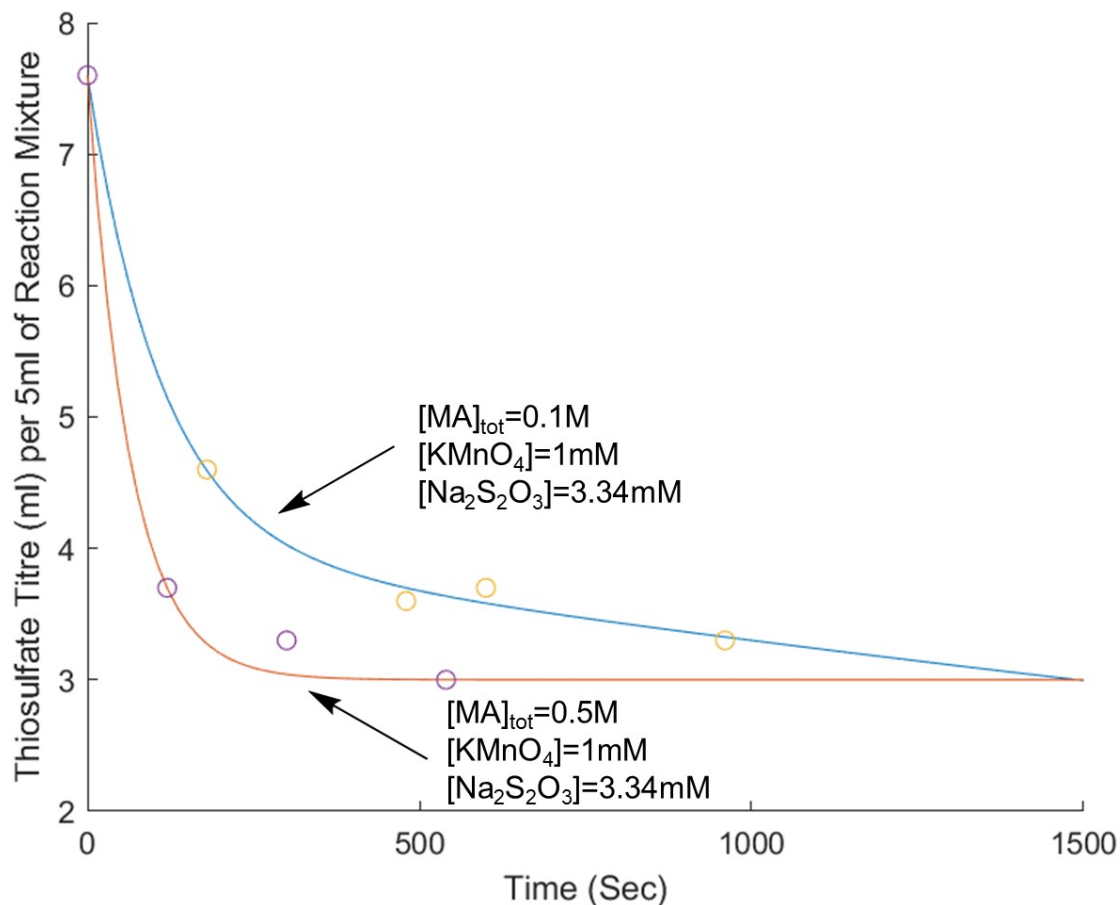

**Figure S11. Determination of oxidation of the intermediate manganese species by Iodometric titrations (pH 4.2)**

**Calculations for the iodometry titrations (determination of oxidation state).**

Dissolved 0.4206 g of sodium thiosulfate pentahydrate (molar mass = 248.18 g/mol) in 500 mL of water giving a concentration of thiosulfate of  $3.4 \times 10^{-3} M$  (3.4 mM).

**Thiosulfate titer for initial permanganate solution at zero time (no reaction)**

$0.005 L \times 0.001 M \text{ Permanganate} \times (2.5 I_2/\text{permanganate}) \times (2 \text{ Thiosulfate}/I_2) (L/0.003389\text{mol}) = 7.4 \text{ mL of thiosulfate.}$

**If the intermediate stabilizes as Mn(IV)**

$0.005 L \times 0.001 \text{ permanganate} \times (\text{Mn(IV)}/\text{permanganate}) \times (I_2/\text{Mn(IV)}) \times (2 \text{ thiosulfate}/I_2) \times L/0.003389 \text{ mol thiosulfate} = 3 \text{ mL of thiosulfate.}$

**If the intermediate stabilizes as Mn(III)**

$0.005 \text{ L} \times 0.001 \text{ permanganate} \times (\text{Mn(III)}/\text{permanganate}) \times (\text{I}_2/2\text{Mn(III)}) \times (2 \text{ thiosulfate}/\text{I}_2) \times \text{L}/0.003389 \text{ mol thiosulfate} = 1.47 \text{ ml of thiosulfate.}$

the iodometric titration data for two concentrations of mandelic acid/mandelate anion (0.1 M and 0.5 M), the thiosulfate titer stabilized around 3-3.2 mL.

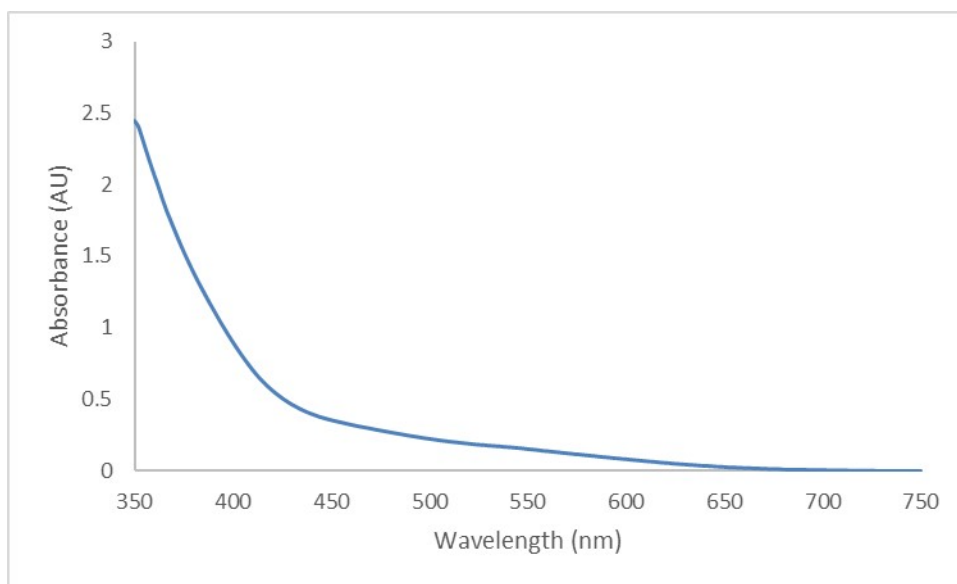

**Figure S12.** shows the final spectra the manganese species at the end of successive scans in Figure 3. Conditions same as in Figure 3.

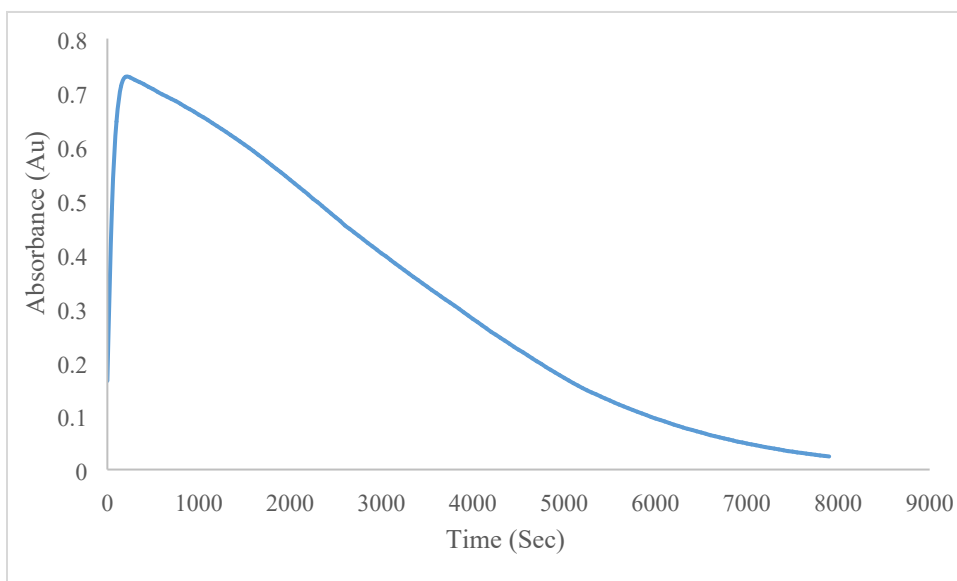

**Figure S13.** Decay of 418 nm intermediate. Conditions same as in Figure 3

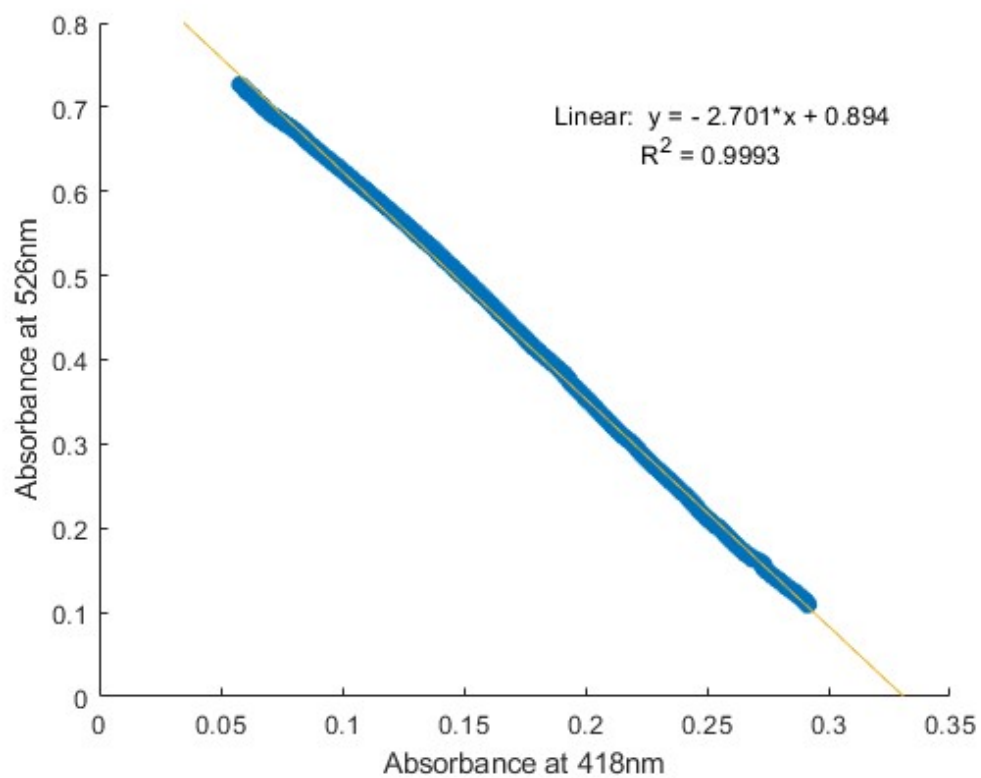

**Figure S14.** Plot of  $A_{526\text{nm}}$  versus  $A_{418\text{nm}}$ . Soluble (colloidal) manganese(IV) intermediate; the end-product of oxidation at neutral pH (phosphate buffer, pH 6.8-7.40).



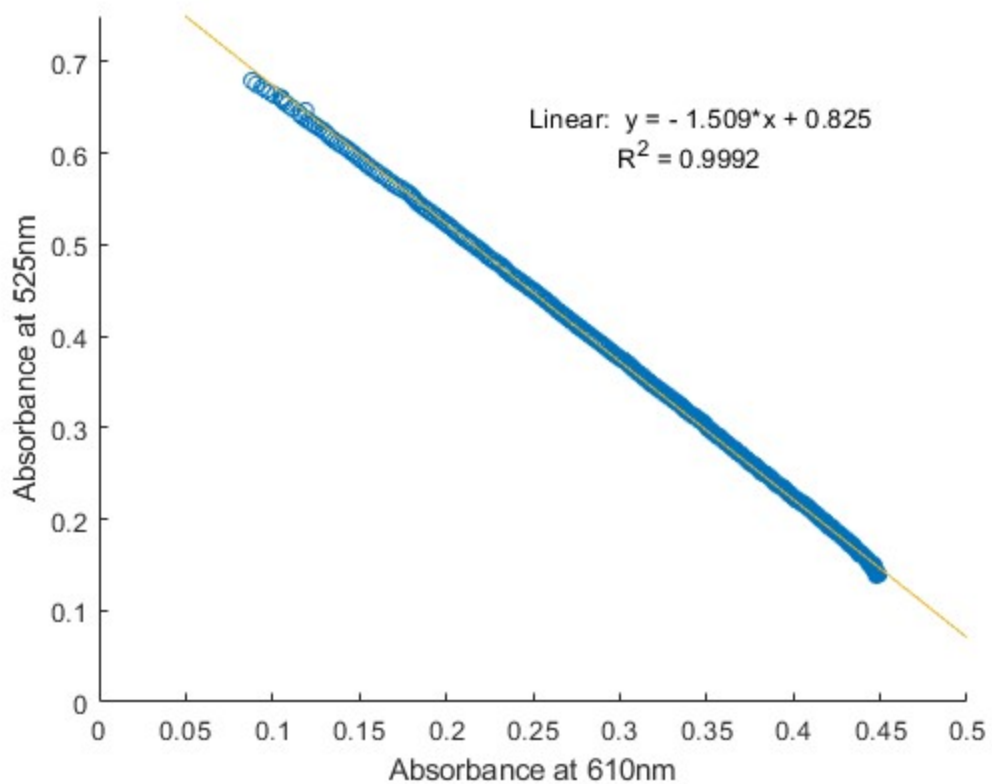

**Figure S15.** The plot of  $\log A_{526\text{nm}}$  versus  $A_{606\text{nm}}$  is linear ( $R^2 = 0.999$ ). Conditions same as in Figure 5.

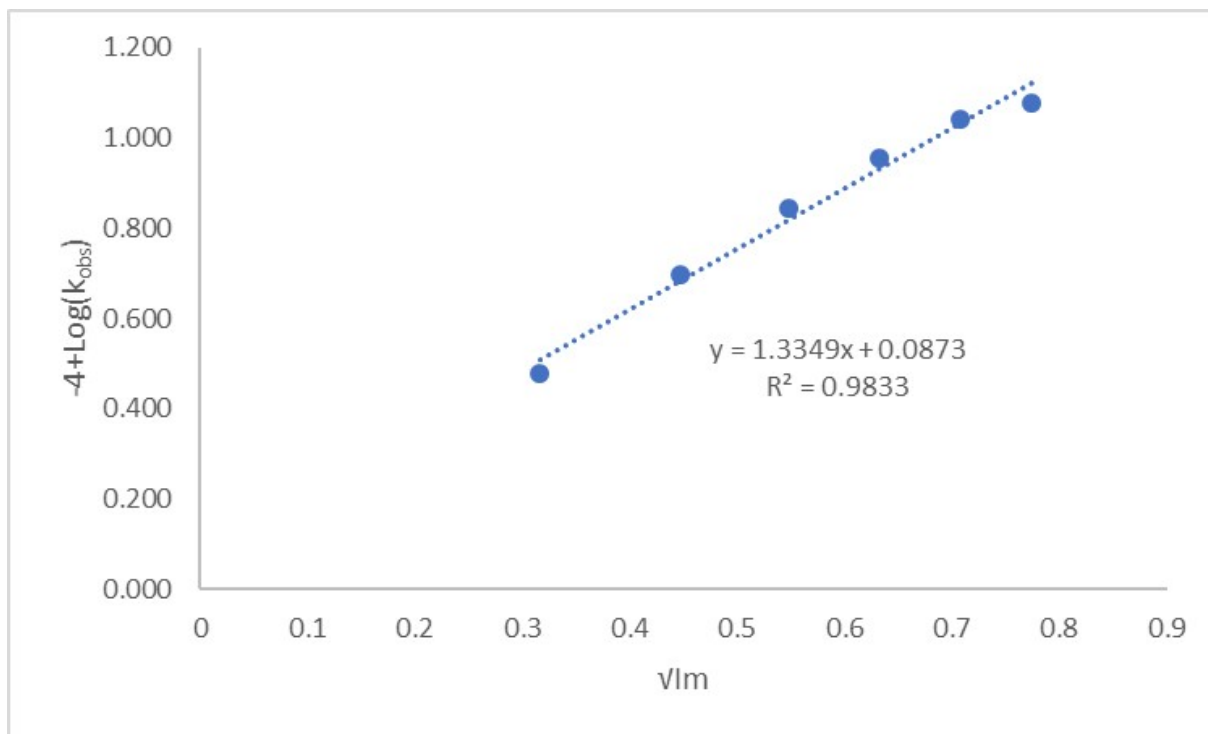

**Figure S16.** Effect of ionic strength (I) in the permanganate oxidation of mandelic acid<sup>a</sup>

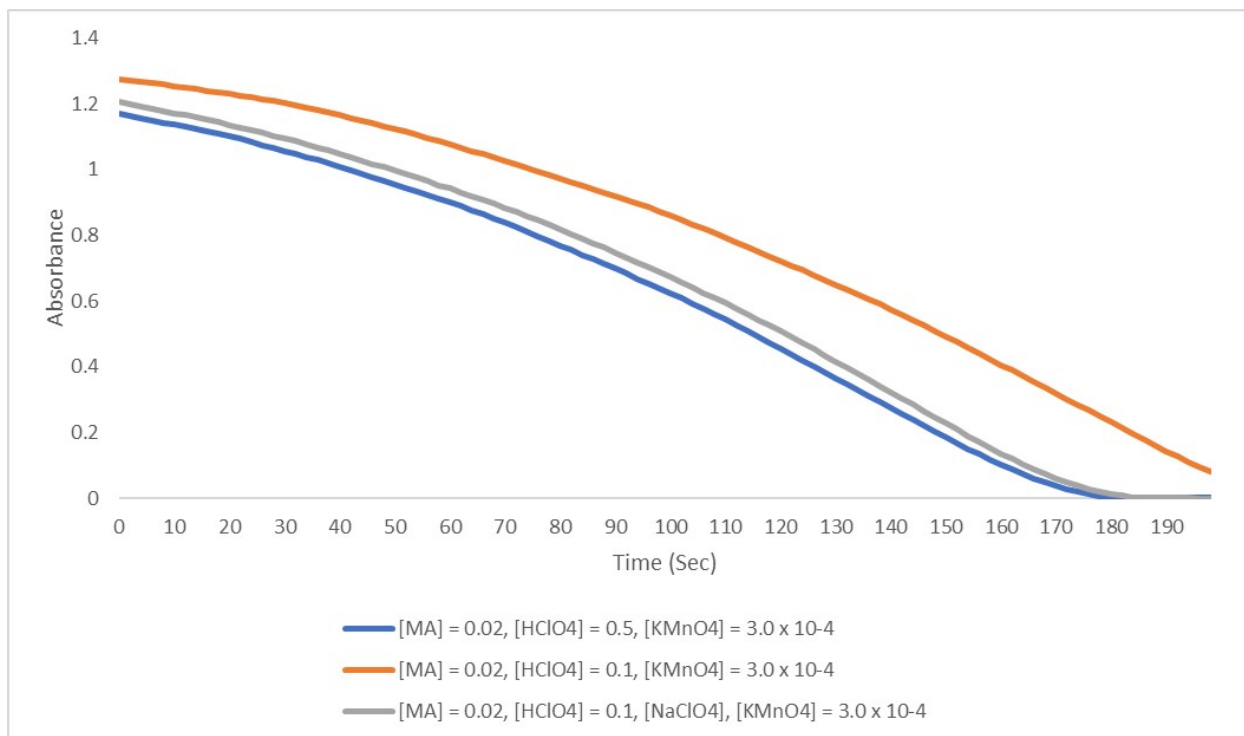

**Figure S17. Oxidation of mandelic acid in acid medium. Reaction followed at 526nm  
22.5±0.5°C**

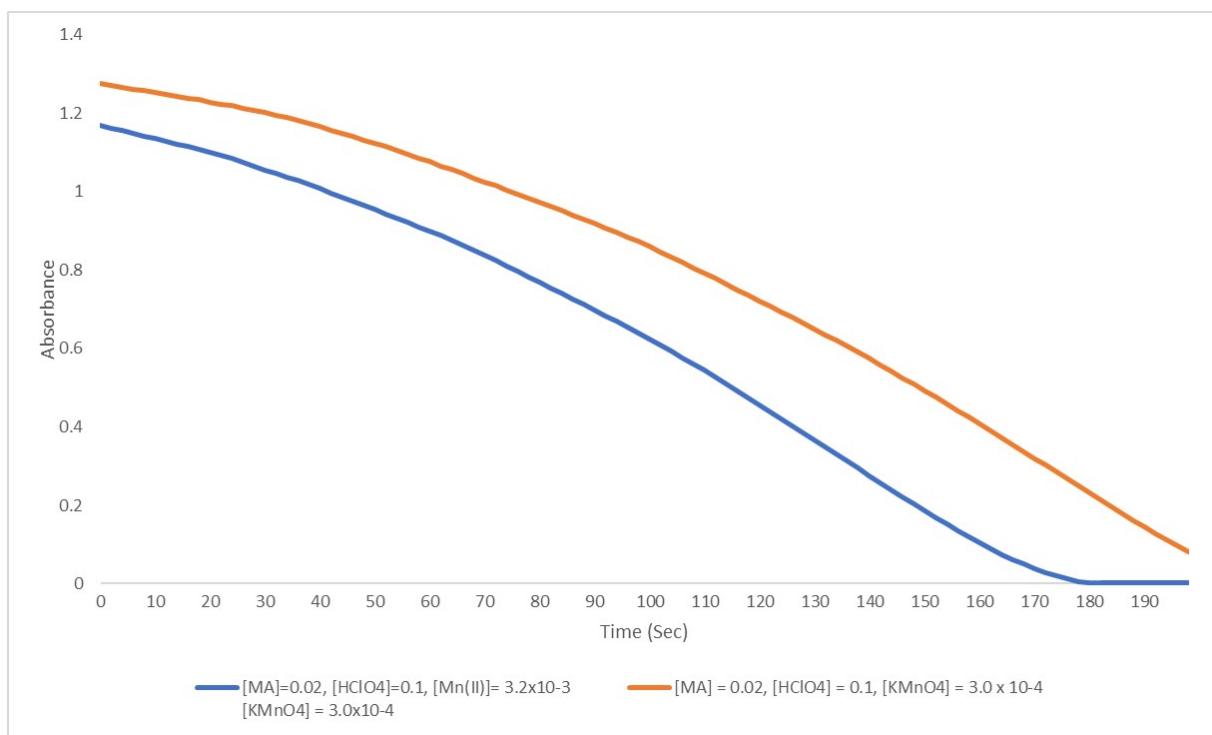

**Figure S18. Effect of added Mn(II) on the oxidation of mandelic acid in acid medium . Reaction followed at 526nm 22.5±0.5°C**

**Table S1.** Dependence on mandelate anion in the oxidation of mandelic acid by permanganate

| [MA], M | $10^4 k_1, \text{sec}^{-1}$<br>(525 nm) | $10^4 k_1, \text{sec}^{-1}$<br>(616 nm) | $k_2 (\text{M}^{-1}\text{sec}^{-1})$ |
|---------|-----------------------------------------|-----------------------------------------|--------------------------------------|
| 0.005   | 3.0                                     | 4.1                                     | 0.071                                |
| 0.02    | 10.1                                    | 12.1                                    | 0.055                                |
| 0.05    | 27.2                                    | 33                                      | 0.060                                |
| 0.10    | 62                                      | 74                                      | 0.068                                |

**pH= 13,  $[\text{MnO}_4^-] = 3 \times 10^{-4} \text{ M}$ , 25 °C; in replicate measurements rate constants are reproducible to  $\pm 7\%$**

**Table S2.**Effect of ionic strength (I) in the permanganate oxidation of mandelic acid<sup>a</sup>

| [OH <sup>-</sup> ], M | [LiClO <sub>4</sub> ], M | Ionic strength 10 <sup>4</sup> k s <sup>-1</sup> (525 nm) |     |
|-----------------------|--------------------------|-----------------------------------------------------------|-----|
| 0.10                  |                          | 0.1                                                       | 3.0 |
| 0.10                  | 0.10                     | 0.2                                                       | 5.0 |
| 0.10                  | 0.20                     | 0.3                                                       | 7.0 |
| 0.10                  | 0.30                     | 0.4                                                       | 9.0 |
| 0.10                  | 0.40                     | 0.5                                                       | 11  |
| 0.10                  | 0.50                     | 0.6                                                       | 12  |
| 0.20                  | 0.20                     | 0.4                                                       | 12  |
| 0.20                  |                          | 0.2                                                       | 6.0 |
| 0.40                  |                          | 0.4                                                       | 12  |
| 0.10                  | 0.90                     | 1.0                                                       | 18  |
| 0.20                  | 0.80                     | 1.0                                                       | 39  |
| 0.30                  | 0.70                     | 1.0                                                       | 75  |

<sup>a</sup>Conditions: [MA] = 0.005 M, [MnO<sub>4</sub><sup>-</sup>] = 3.0 x 10<sup>-4</sup> M, T = 25 °C

**Table S3.** Effect of ionic strength (I) in the permanganate oxidation of mandelic acid<sup>a</sup>

| Effect of Ionic Strength |                    |                       |                                                  |                                  |                           |
|--------------------------|--------------------|-----------------------|--------------------------------------------------|----------------------------------|---------------------------|
| OH                       | LiClO <sub>4</sub> | <i>I</i> <sub>m</sub> | 10 <sup>4</sup> k <sub>obs</sub> S <sup>-1</sup> | <i>v</i> / <i>I</i> <sub>m</sub> | -4+Log(k <sub>obs</sub> ) |
| 0.1                      | 0                  | 0.1                   | 3.0±0.2                                          | 0.316                            | 0.477                     |
| 0.1                      | 0.1                | 0.2                   | 5.0±0.4                                          | 0.447                            | 0.699                     |
| 0.1                      | 0.2                | 0.3                   | 7.0±0.5                                          | 0.548                            | 0.845                     |
| 0.1                      | 0.3                | 0.4                   | 9.0±0.6                                          | 0.632                            | 0.954                     |
| 0.1                      | 0.4                | 0.5                   | 11.0±0.8                                         | 0.707                            | 1.041                     |
| 0.1                      | 0.5                | 0.6                   | 12.0±0.8                                         | 0.775                            | 1.079                     |
